# Supplementary material for: Variations in boundary layer stability across Antarctica: a comparison between coastal and interior sites
Source: Copernicus journal article supplement (doi:10.5194/wcd-4-1045-2023), 2023-12-01
Supplement: Supplementary file 1 [file wcd-4-1045-2023-supplement.pdf]

Supplement of Weather Clim. Dynam., 4, 1045–1069, 2023  
<https://doi.org/10.5194/wcd-4-1045-2023-supplement>  
© Author(s) 2023. CC BY 4.0 License.

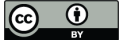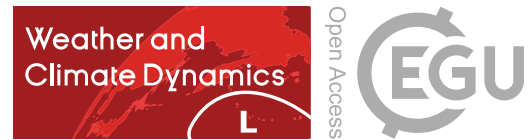

*Supplement of*

## **Variations in boundary layer stability across Antarctica: a comparison between coastal and interior sites**

**Mckenzie J. Dice et al.**

*Correspondence to:* Mckenzie J. Dice ([mckenzie.dice@colorado.edu](mailto:mckenzie.dice@colorado.edu))

The copyright of individual parts of the supplement might differ from the article licence.

# 1 Supplemental Figures

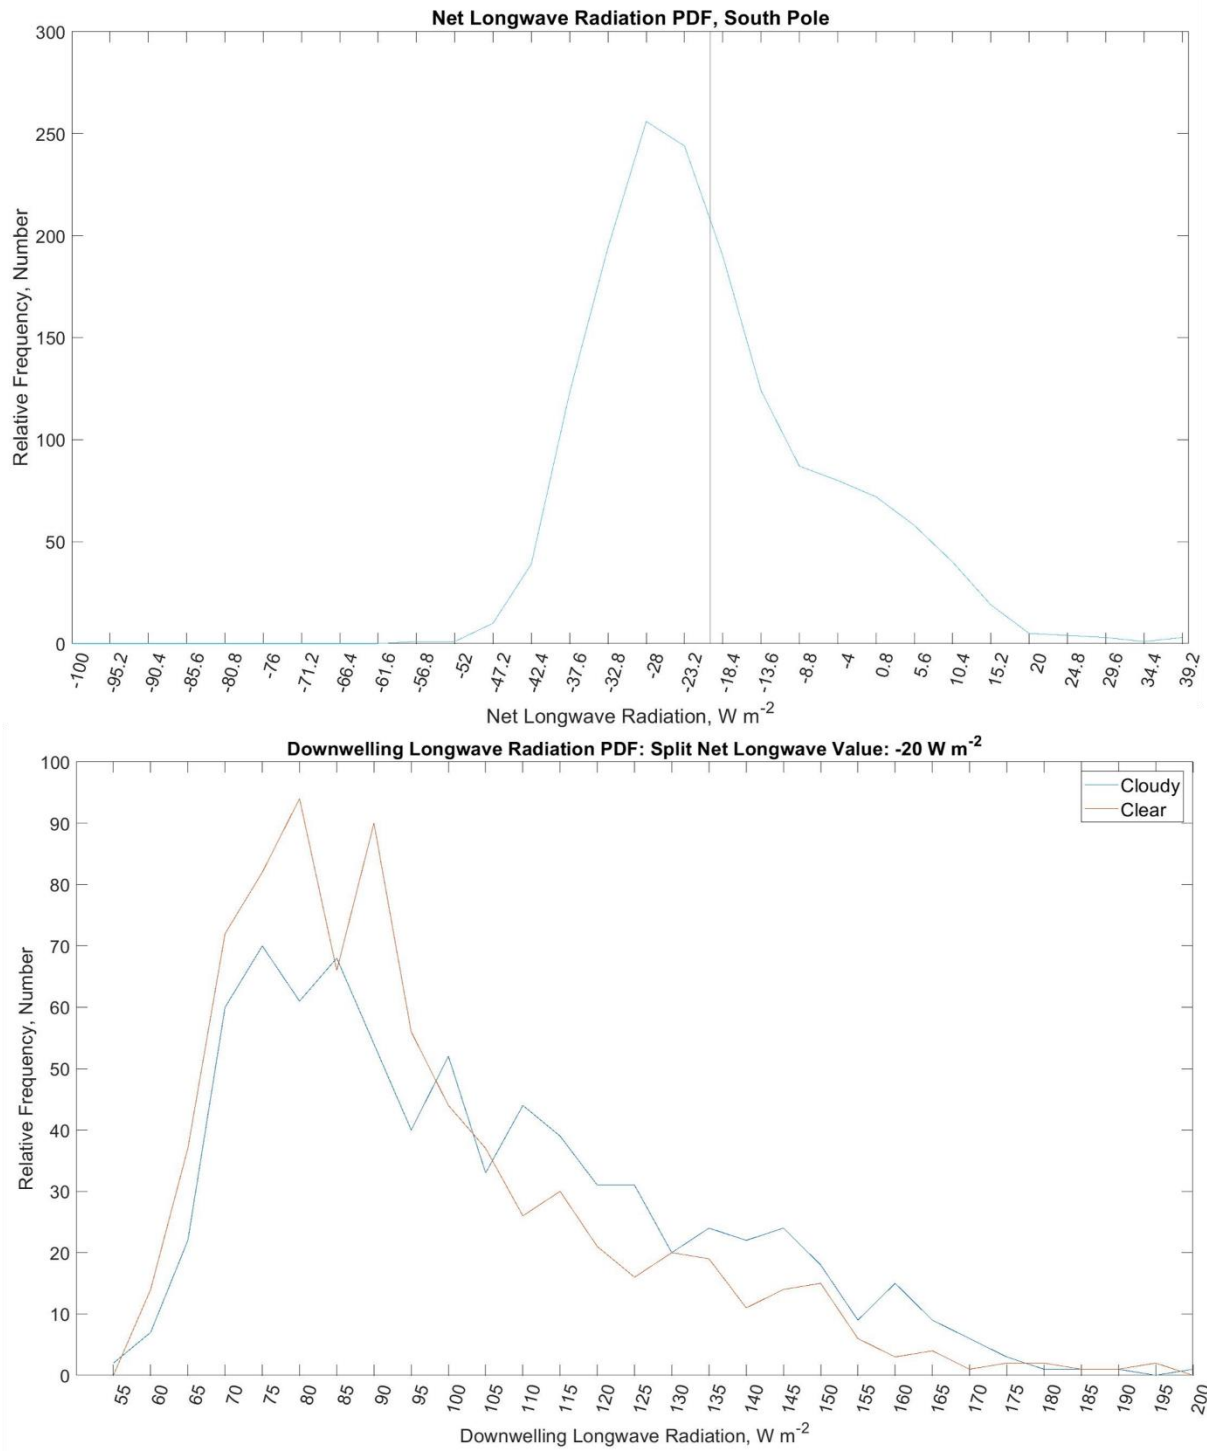

2 *Figure S1: PDFs of net longwave radiation (top) and downwelling longwave radiation for clear (orange) and*  
3 *cloudy (blue) states (bottom) at South Pole. In the top panel the vertical black line marks the value of net longwave*  
4 *radiation that corresponds to the minimum overlap ratio used to define clear and cloudy states.*

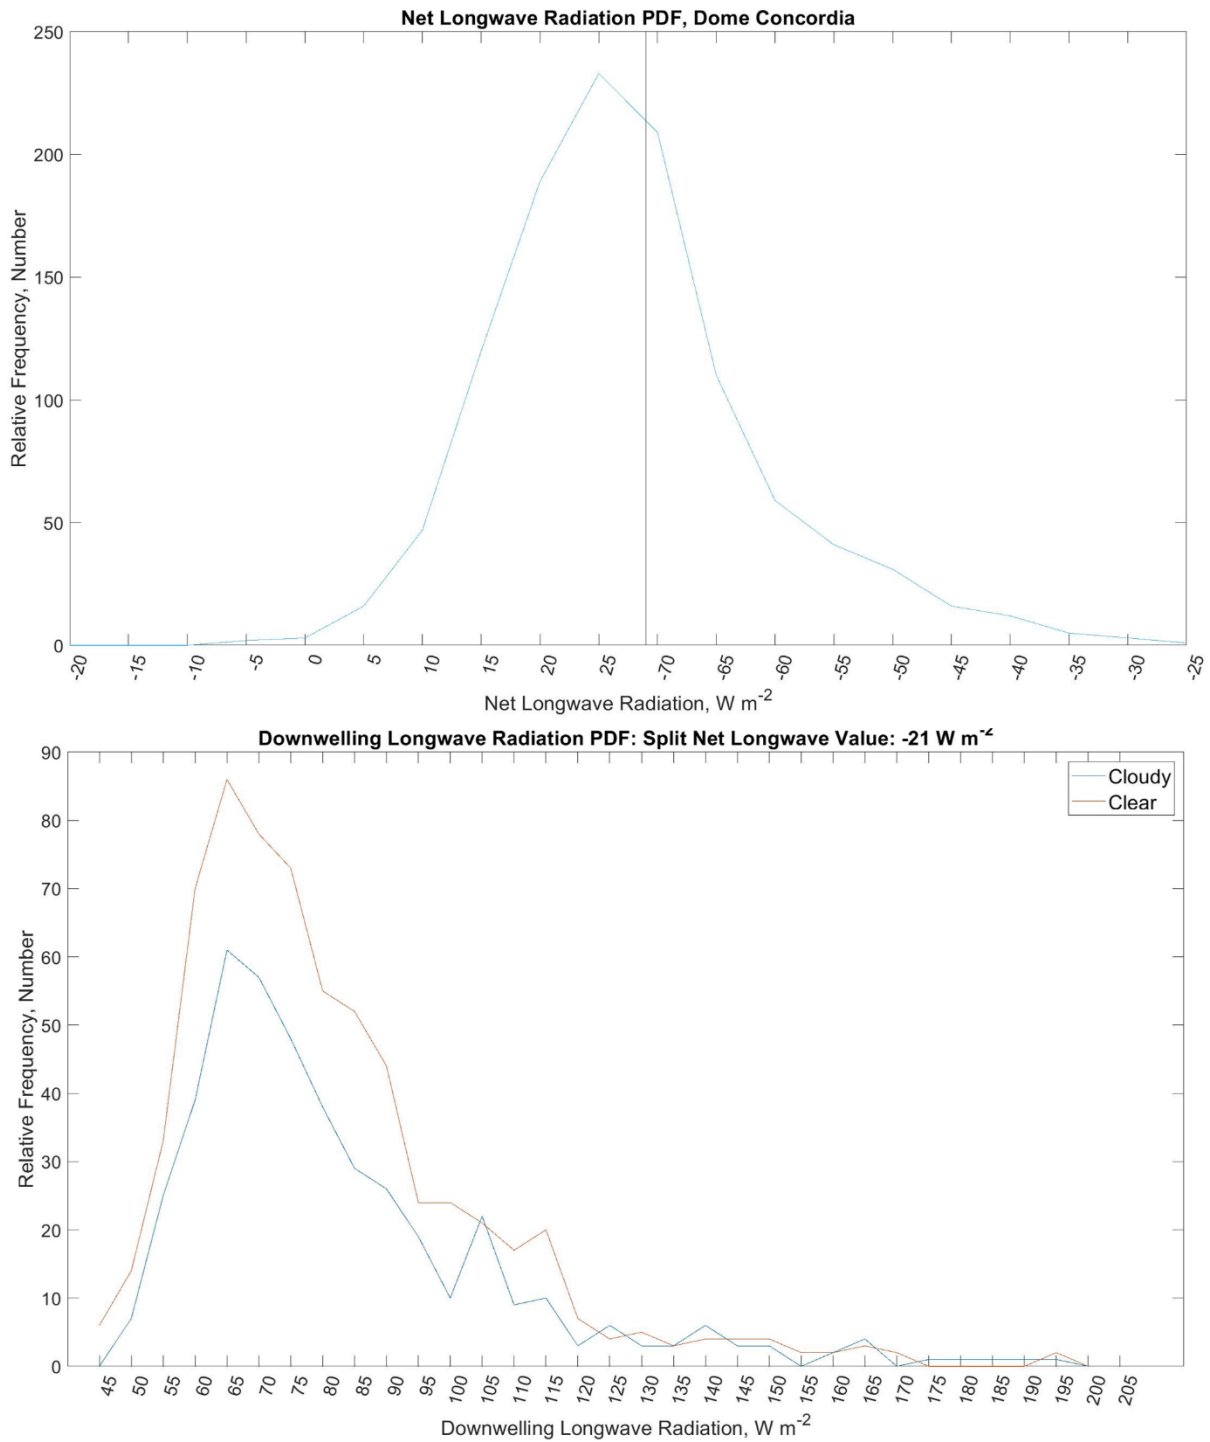

5 *Figure S2: PDFs of net longwave radiation (top) and downwelling longwave radiation for clear (orange) and*  
 6 *cloudy (blue) states (bottom) Dome C. In the top panel the vertical black line marks the value of net longwave*  
 7 *radiation that corresponds to the minimum overlap ratio used to define clear and cloudy states.*

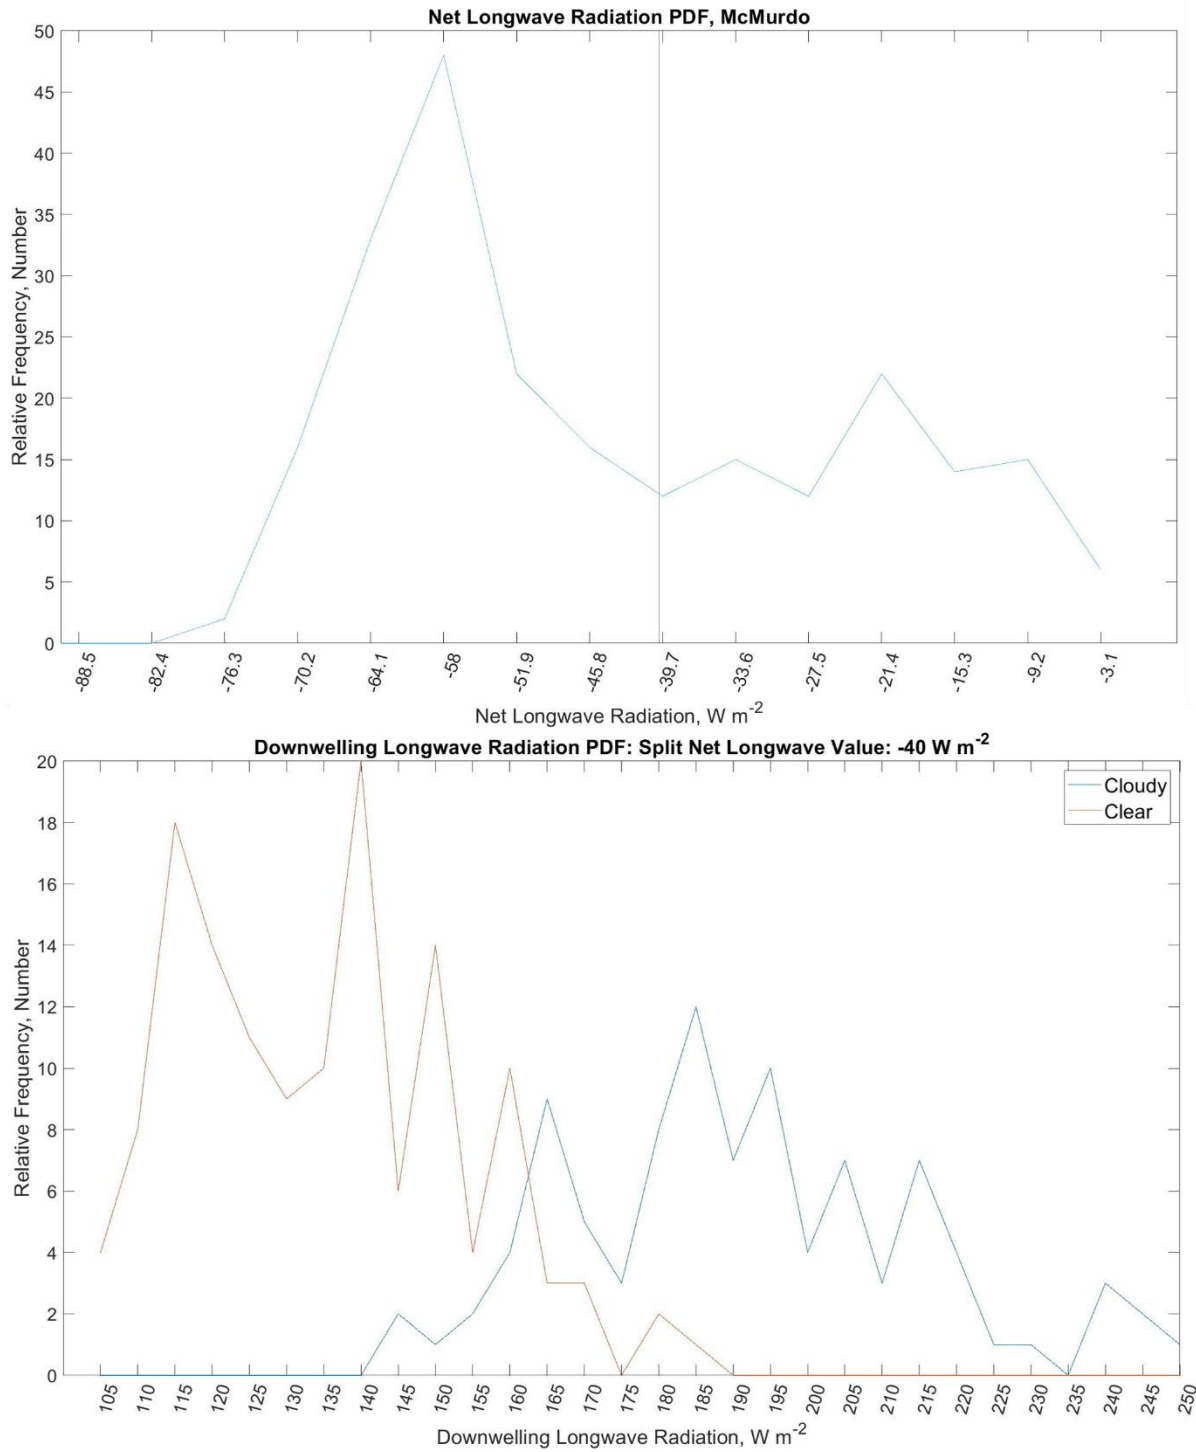

8 Figure S3: PDFs of net longwave radiation (top) and downwelling longwave radiation for clear (orange) and  
 9 cloudy (blue) states (bottom) at McMurdo. In the top panel the vertical black line marks the value of net longwave  
 10 radiation that corresponds to the minimum overlap ratio used to define clear and cloudy states.

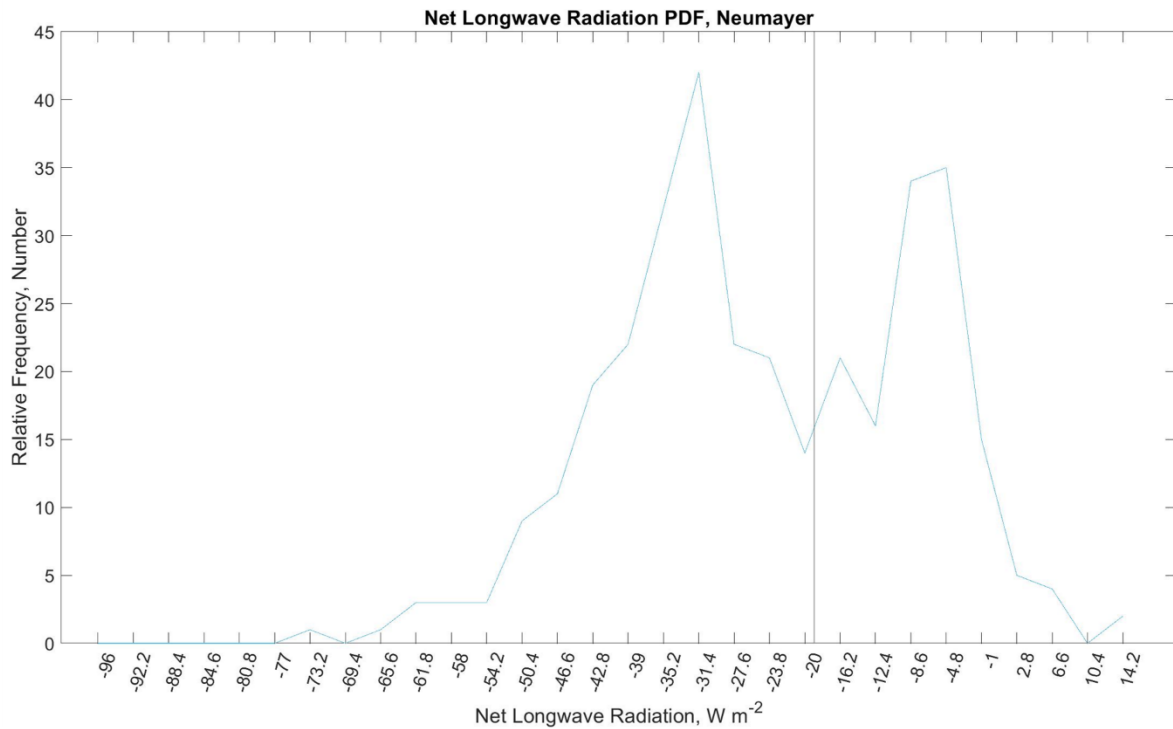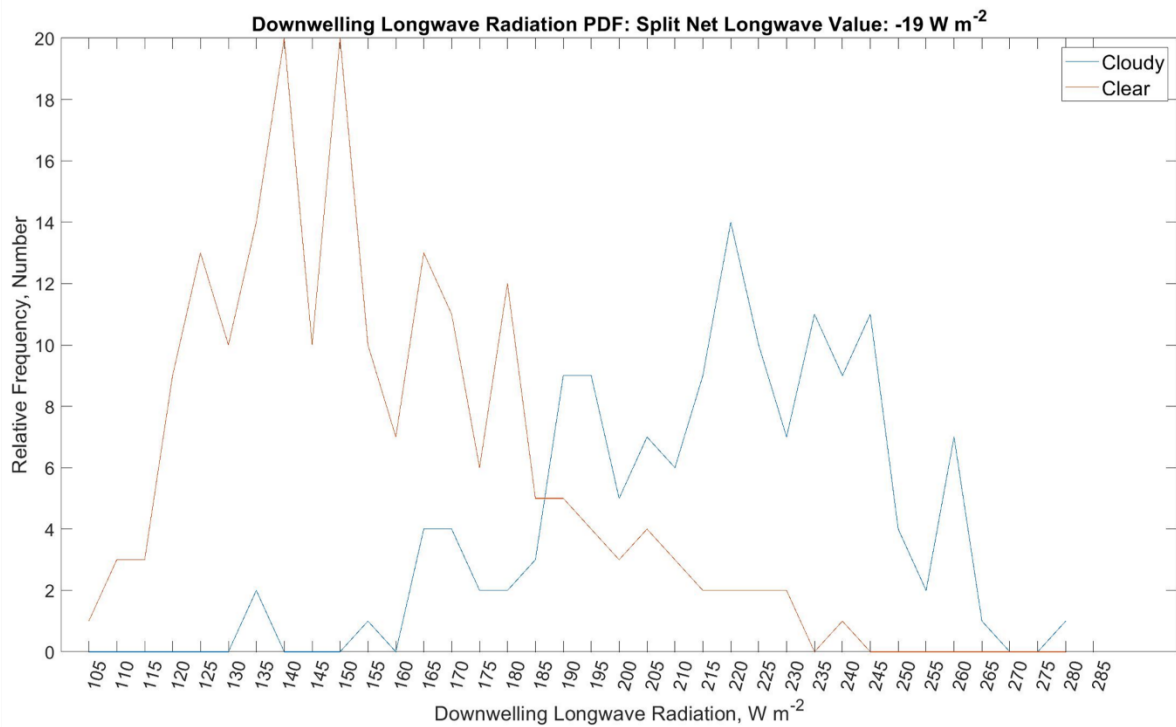

11 *Figure S4: PDFs of net longwave radiation (top) and downwelling longwave radiation for clear (orange) and*  
 12 *cloudy (blue) states (bottom) at Neumayer. In the top panel the vertical black line marks the value of net longwave*  
 13 *radiation that corresponds to the minimum overlap ratio used to define clear and cloudy states.*

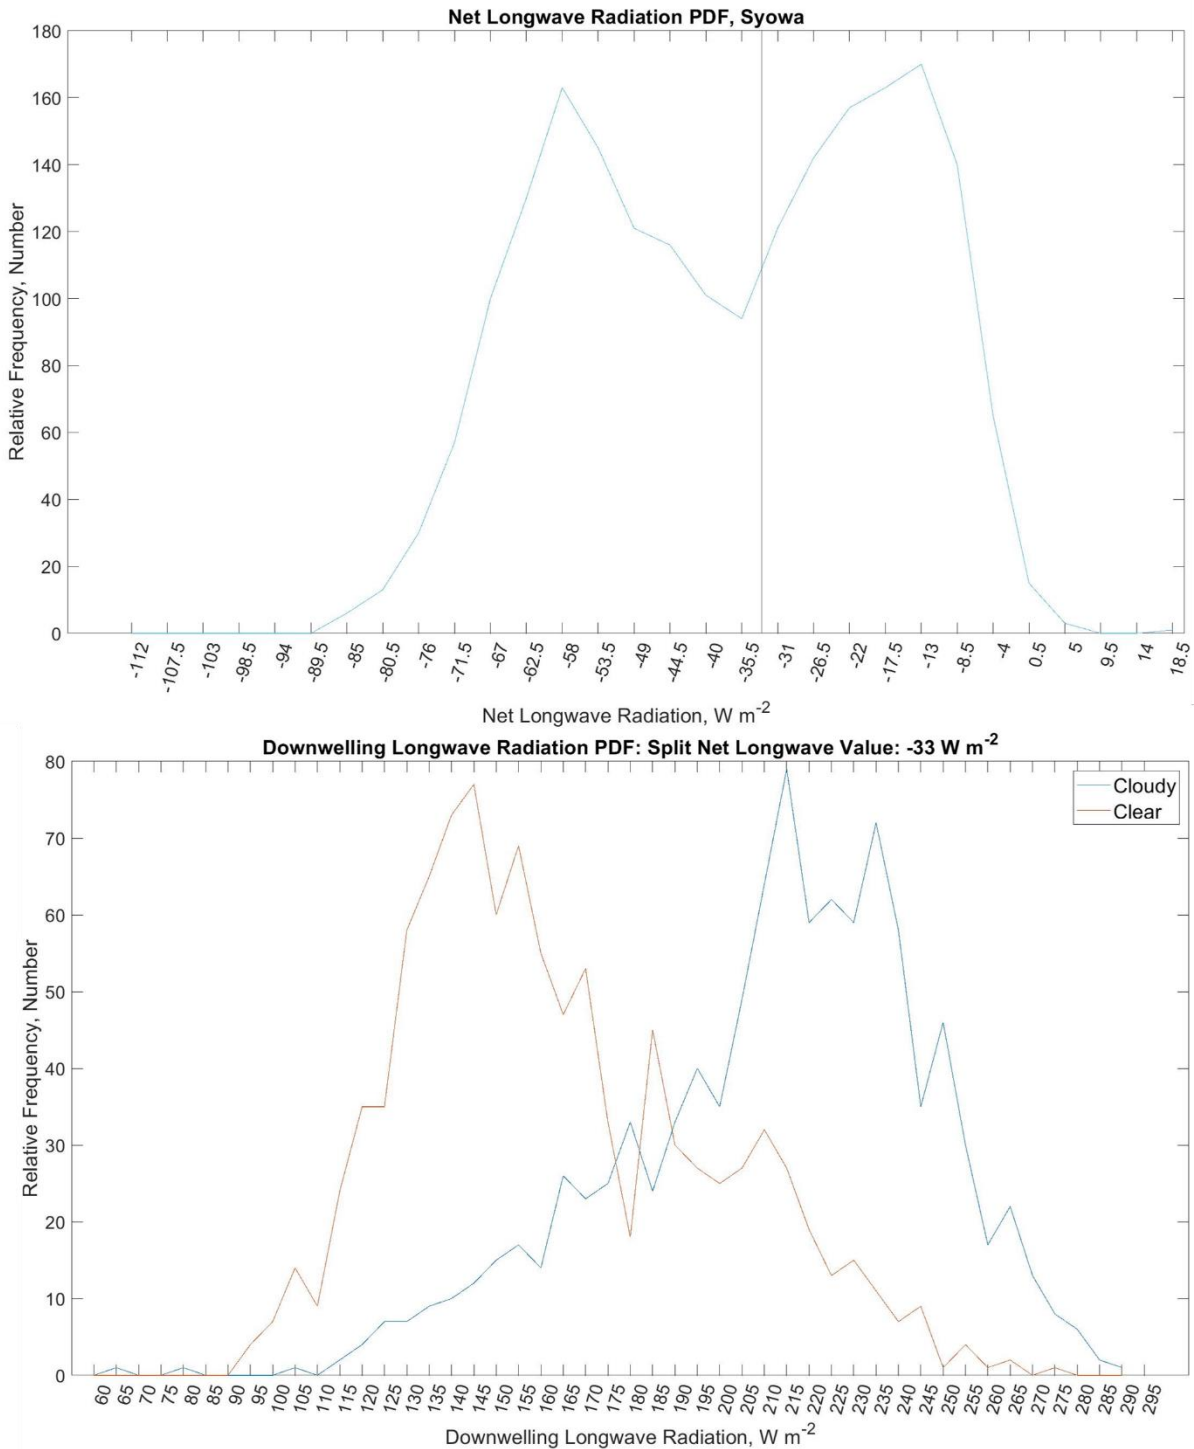

14 Figure S5: PDFs of net longwave radiation (top) and downwelling longwave radiation for clear (orange) and  
 15 cloudy (blue) states (bottom) at Syowa. In the top panel the vertical black line marks the value of net longwave  
 16 radiation that corresponds to the minimum overlap ratio used to define clear and cloudy states.

17 *Table S1: Frequency of stability regimes WS and weaker, MS and stronger, and SS and stronger, annually and*  
 18 *seasonally for each site, for the near-surface stability regimes (left) and for the strongest stability below 500 m*  
 19 *(right).*

| Near-Surface Stability Regimes |               |                 |                 | Strongest Stability Present Below 500 m |               |                 |                 |
|--------------------------------|---------------|-----------------|-----------------|-----------------------------------------|---------------|-----------------|-----------------|
| Site                           | WS and Weaker | MS and Stronger | SS and Stronger | Site                                    | WS and Weaker | MS and Stronger | SS and Stronger |
| <b>Annual</b>                  |               |                 |                 |                                         |               |                 |                 |
| South Pole                     | 27.2%         | 72.7%           | 51%             | South Pole                              | 3.3%          | 96.7%           | 85.2%           |
| Dome C                         | 13.5%         | 86.5%           | 73.6%           | Dome C                                  | 3.2%          | 96.5%           | 82.4%           |
| McMurdo                        | 72.4%         | 27.5%           | 10.6%           | McMurdo                                 | 23.3%         | 76.6%           | 36.4%           |
| Neumayer                       | 61.3%         | 38.9%           | 18.3%           | Neumayer                                | 27.5%         | 72.4%           | 33.3%           |
| Syowa                          | 68.2%         | 19.7%           | 6.8%            | Syowa                                   | 43.6%         | 56.5%           | 11.4%           |
| <b>Summer</b>                  |               |                 |                 |                                         |               |                 |                 |
| South Pole                     | 63.2%         | 36.9%           | 10.3%           | South Pole                              | 13.3%         | 86.7%           | 43.9%           |
| Dome C                         | 61.4%         | 38.6%           | 7.5%            | Dome C                                  | 17.7%         | 81.9%           | 20%             |
| McMurdo                        | 92.1%         | 7.8%            | 0.5%            | McMurdo                                 | 42.1%         | 57.9%           | 13.6%           |
| Neumayer                       | 80.1%         | 19.9%           | 5.9%            | Neumayer                                | 49.4%         | 50.6%           | 14.9%           |
| Syowa                          | 82.9%         | 17.1%           | 1.8%            | Syowa                                   | 59.6%         | 40.4%           | 4.3%            |
| <b>Fall</b>                    |               |                 |                 |                                         |               |                 |                 |
| South Pole                     | 13%           | 86.9%           | 67.6%           | South Pole                              | 0.2%          | 99.7%           | 98.3%           |
| Dome C                         | 4.7%          | 95.4%           | 83.8%           | Dome C                                  | 0.1%          | 98.9%           | 93.5%           |
| McMurdo                        | 76.1%         | 23.9%           | 10.6%           | McMurdo                                 | 25%           | 75%             | 37.2%           |
| Neumayer                       | 55.7%         | 44.6%           | 21.2%           | Neumayer                                | 19.9%         | 81%             | 37.1%           |
| Syowa                          | 75.2%         | 24.8%           | 4.4%            | Syowa                                   | 50%           | 46.1%           | 7.7%            |
| <b>Winter</b>                  |               |                 |                 |                                         |               |                 |                 |
| South Pole                     | 14.1%         | 85.8%           | 68.8%           | South Pole                              | 0.1%          | 99.8%           | 99.6%           |
| Dome C                         | 0.8%          | 99.5%           | 96.9%           | Dome C                                  | 0.1%          | 100%            | 99.2%           |
| McMurdo                        | 53.6%         | 46.4%           | 18.9%           | McMurdo                                 | 8.5%          | 91.6%           | 53.3%           |
| Neumayer                       | 40%           | 60.2%           | 33.4%           | Neumayer                                | 10.7%         | 89.4%           | 54.3%           |
| Syowa                          | 53.6%         | 46.4%           | 12.3%           | Syowa                                   | 27.8%         | 72.1%           | 18.2%           |
| <b>Spring</b>                  |               |                 |                 |                                         |               |                 |                 |
| South Pole                     | 22.3%         | 77.7%           | 53.4%           | South Pole                              | 0.5%          | 99.7%           | 94.5%           |
| Dome C                         | 5.4%          | 95.3%           | 79.6%           | Dome C                                  | 0.2%          | 100%            | 92.4%           |
| McMurdo                        | 71.8%         | 28.2%           | 11.1%           | McMurdo                                 | 20.5%         | 79.5%           | 38.7%           |
| Neumayer                       | 67.2%         | 32.9%           | 13.6%           | Neumayer                                | 26.3%         | 72.2%           | 27.9%           |
| Syowa                          | 69.2%         | 30.8%           | 6.1%            | Syowa                                   | 46.2%         | 53.7%           | 11.2%           |
